# Supplementary material
Source: PubMed Central journal article supplement (PMC2950316)
Supplement: NIHMS234272-supplement-01.pdf [file NIHMS234272-supplement-01.pdf]

# Supplementary Data:

## A concise synthesis of $\beta$ -sitosterol and other phytosterols

Jiliang Hang and Patrick Dussault\*

*Department of Chemistry, University of Nebraska–Lincoln, Lincoln, NE 68588-0304*

*pdussault1@unl.edu*

### Table of Contents:

|                                |    |
|--------------------------------|----|
| <b>6ab</b> ( <sup>1</sup> H)   | 2  |
| <b>6ab</b> ( <sup>13</sup> C)  | 2  |
| <b>7ab</b> ( <sup>1</sup> H)   | 3  |
| <b>7ab</b> ( <sup>13</sup> C)  | 3  |
| <b>4</b> ( <sup>1</sup> H)     | 4  |
| <b>4</b> ( <sup>13</sup> C)    | 4  |
| <b>3</b> ( <sup>1</sup> H)     | 5  |
| <b>3</b> ( <sup>13</sup> C)    | 5  |
| <b>9</b> ( <sup>1</sup> H)     | 6  |
| <b>9</b> ( <sup>13</sup> C)    | 6  |
| <b>10</b> ( <sup>1</sup> H)    | 7  |
| <b>10</b> ( <sup>13</sup> C)   | 7  |
| <b>11ab</b> ( <sup>1</sup> H)  | 8  |
| <b>11ab</b> ( <sup>13</sup> C) | 8  |
| <b>12ab</b> ( <sup>1</sup> H)  | 9  |
| <b>12ab</b> ( <sup>13</sup> C) | 9  |
| <b>13ab</b> ( <sup>1</sup> H)  | 10 |
| <b>13ab</b> ( <sup>13</sup> C) | 10 |
| <b>14</b> ( <sup>1</sup> H)    | 11 |
| <b>14</b> ( <sup>13</sup> C)   | 11 |

## SpinWorks 3: 1D Proton NMR

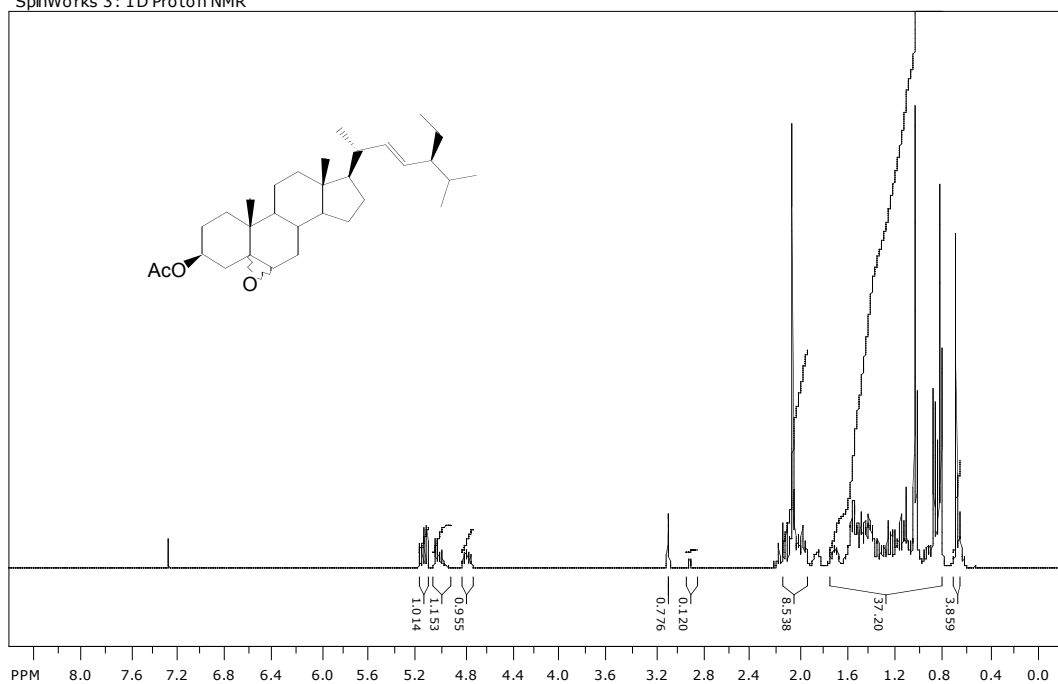

## SpinWorks 3: 13C

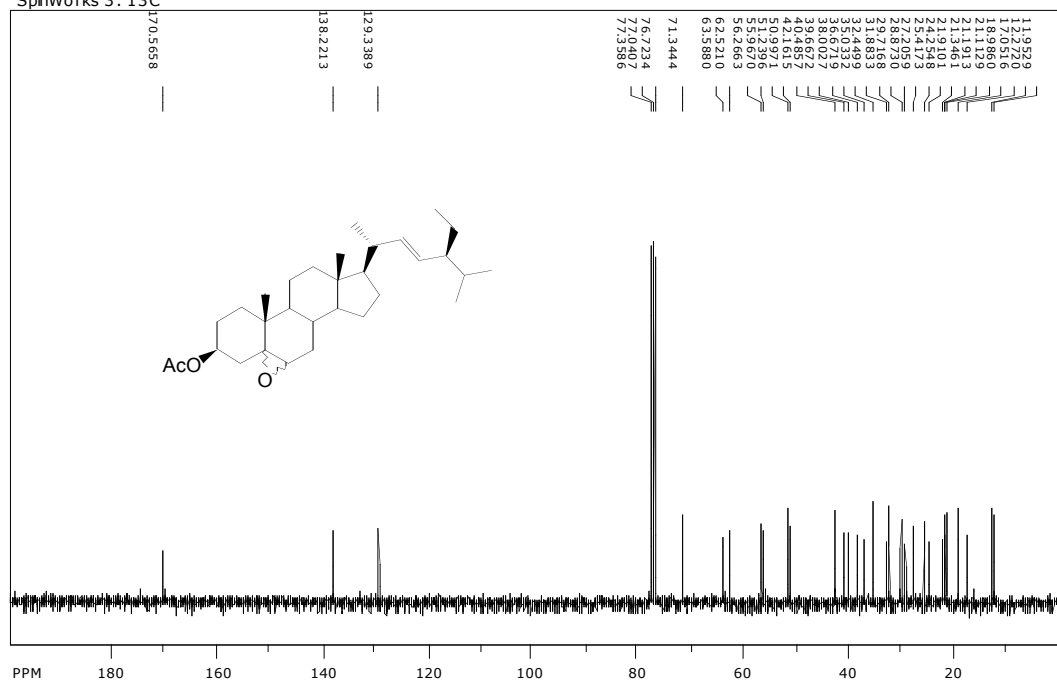 $^1\text{H}$  and  $^{13}\text{C}$  of 6ab

SphWorks 3: 1D Proton NMR

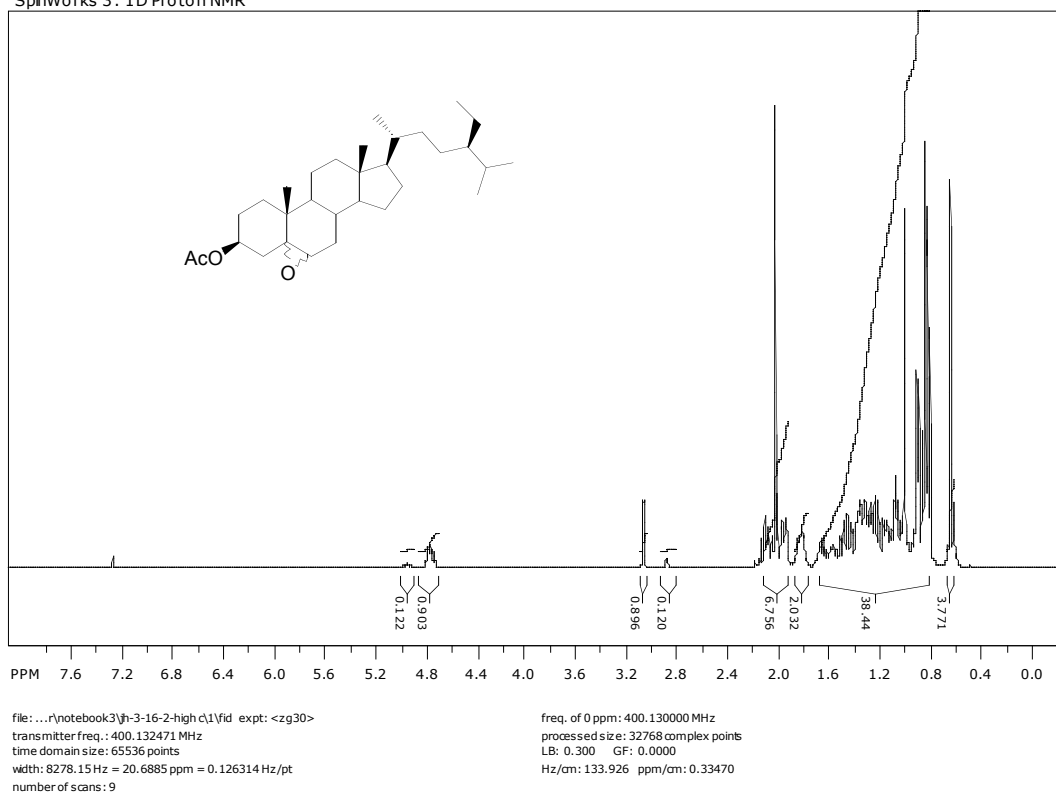

SphWorks 3: 13C

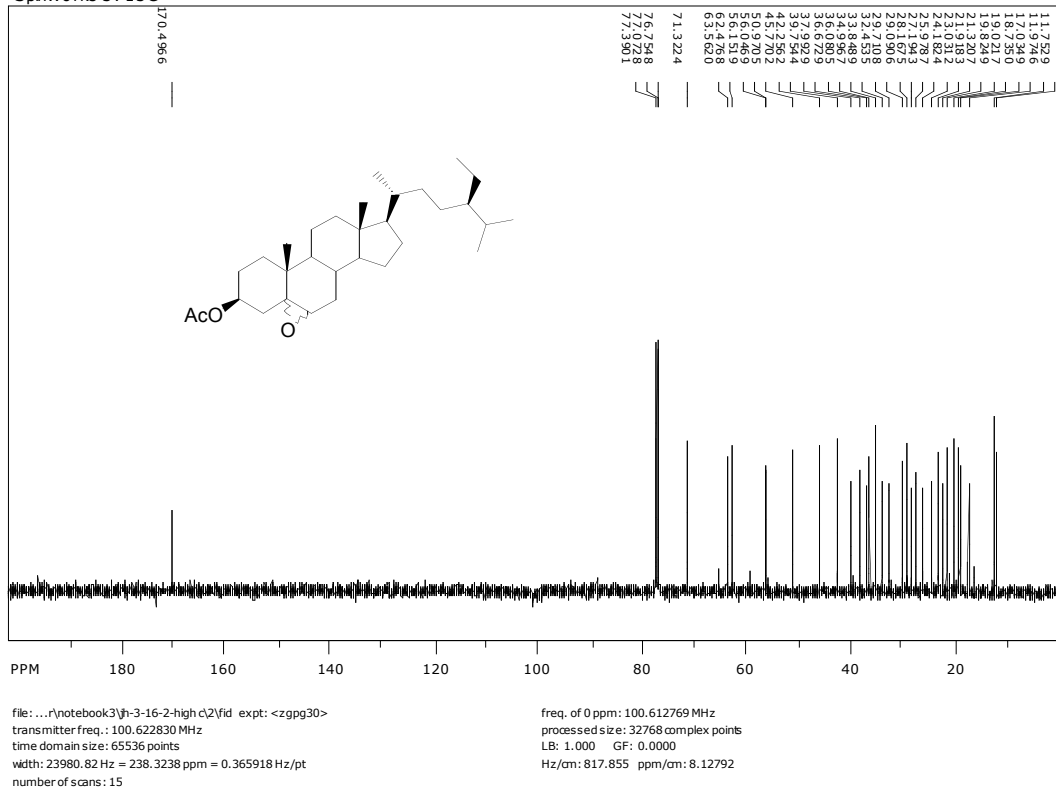

<sup>1</sup>H and <sup>13</sup>C of 7ab

SphWorks 3: 1D Proton NMR

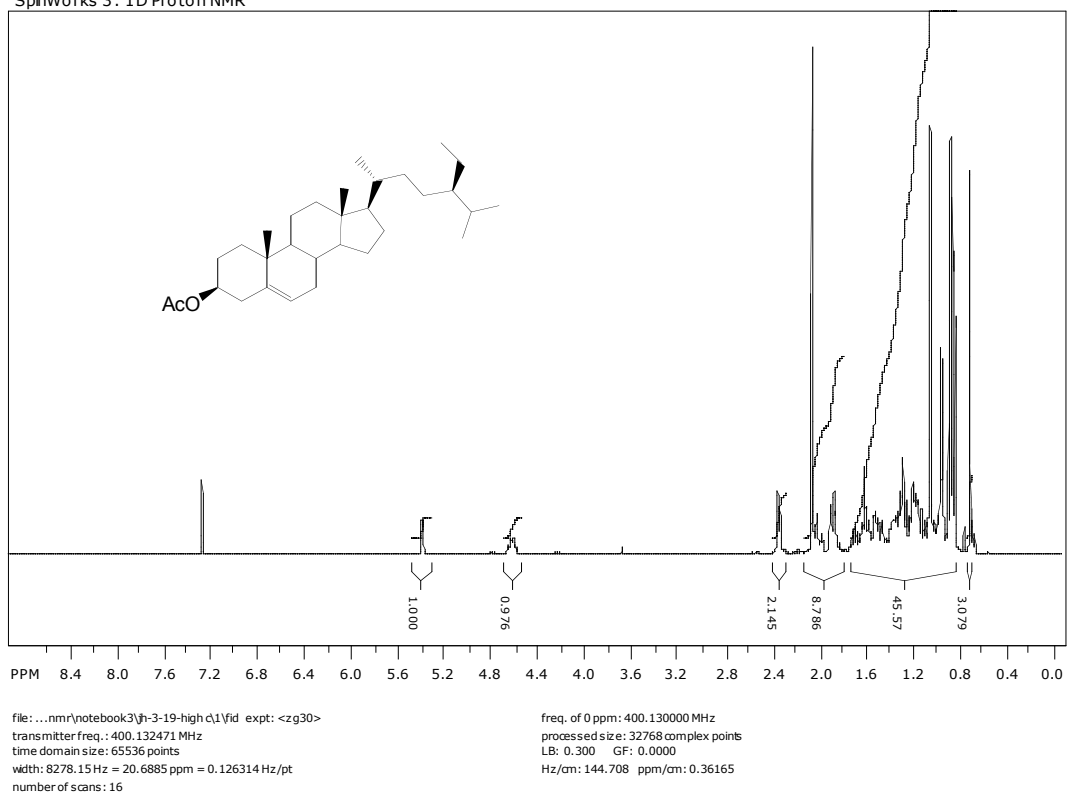

SphWorks 3: 13C

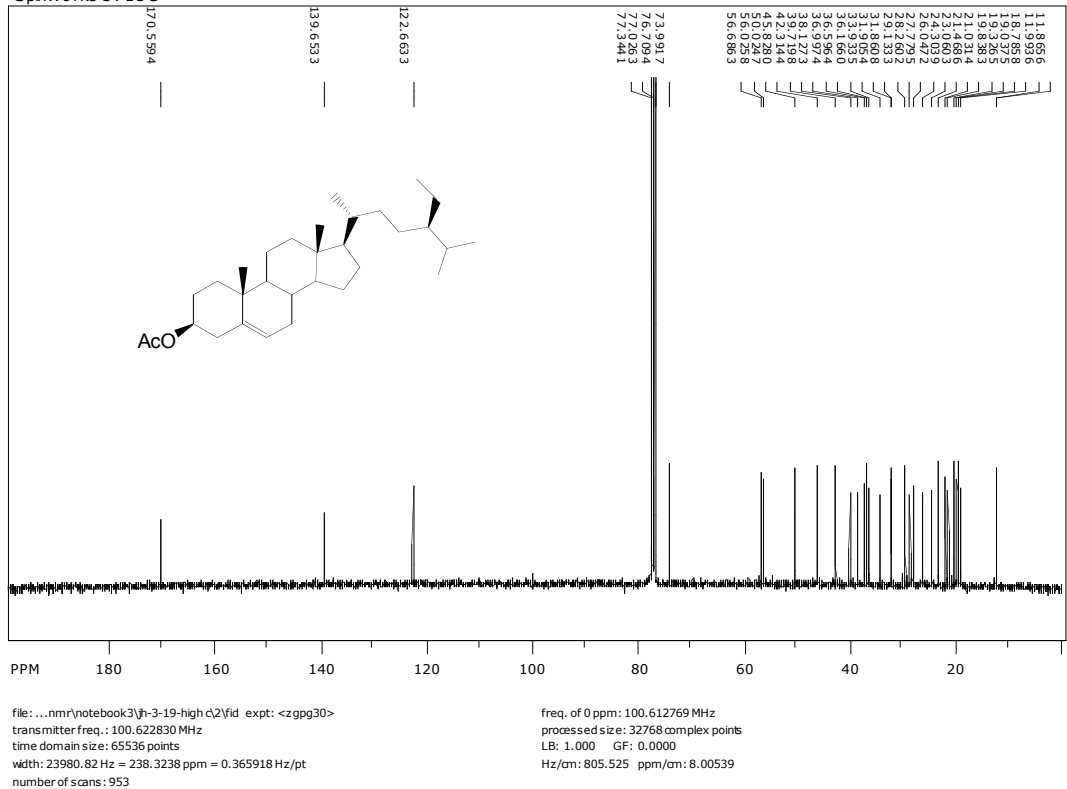

<sup>1</sup>H and <sup>13</sup>C of beta-sitosterol acetate (4)

SphWorks 3: 1D Proton NMR

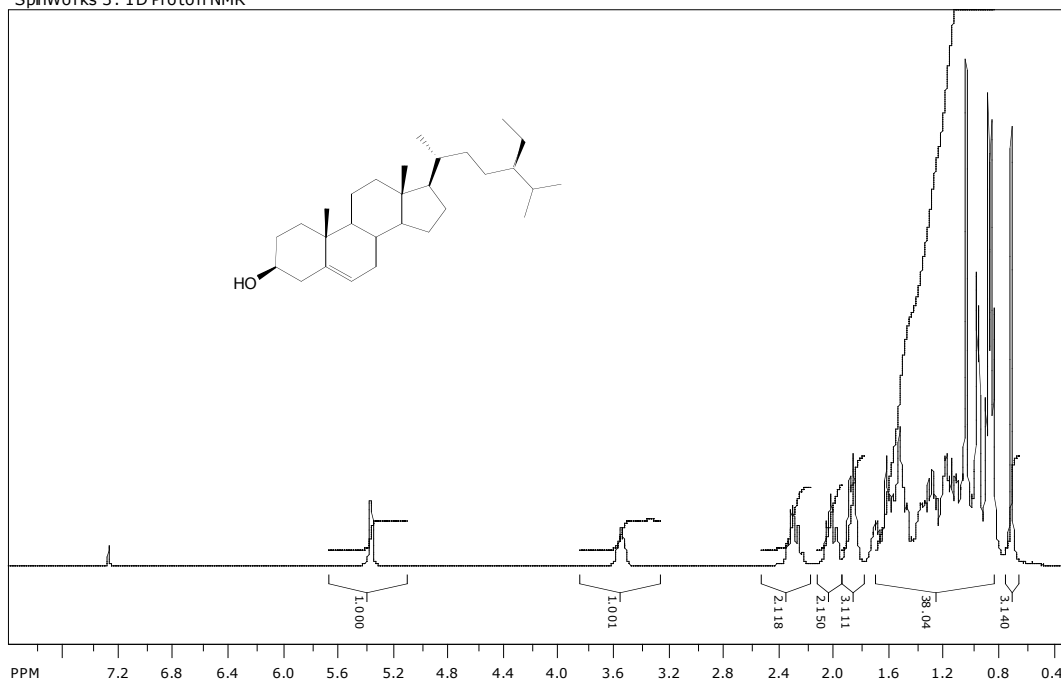

file: ...nmr\notebook3\jh-3-20-high.c1\fid expt: <zg30>  
 transmitter freq.: 400.132471 MHz  
 time domain size: 65536 points  
 width: 8278.15 Hz = 20.6885 ppm = 0.126314 Hz/pt  
 number of scans: 16

freq. of 0 ppm: 400.130000 MHz  
 processed size: 32768 complex points  
 LB: 0.300 GF: 0.0000  
 Hz/cm: 123.167 ppm/cm: 0.30782

SphWorks 3: 13C

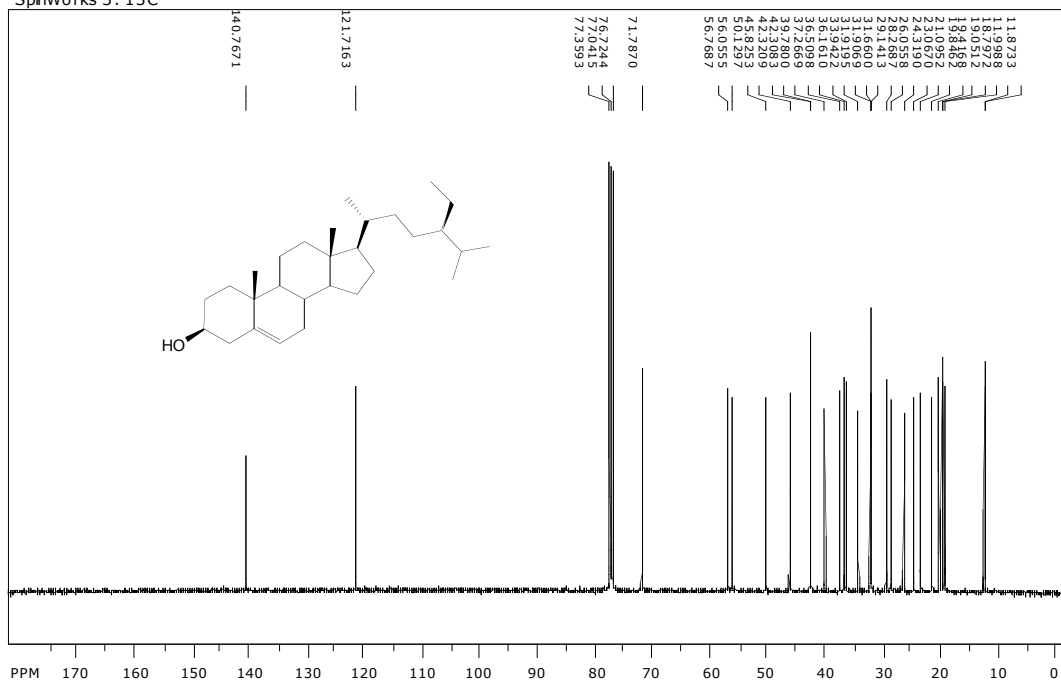

file: ...ata\nmr\notebook3\jh-3-20-III\fid expt: <zpgg30>  
 transmitter freq.: 100.622830 MHz  
 time domain size: 65536 points  
 width: 23980.82 Hz = 238.3238 ppm = 0.365918 Hz/pt  
 number of scans: 990

freq. of 0 ppm: 100.612769 MHz  
 processed size: 32768 complex points  
 LB: 1.000 GF: 0.0000  
 Hz/cm: 740.590 ppm/cm: 7.36006

<sup>1</sup>H and <sup>13</sup>C of beta-sitosterol (3)



SphWorks 3: 1D Proton NMR

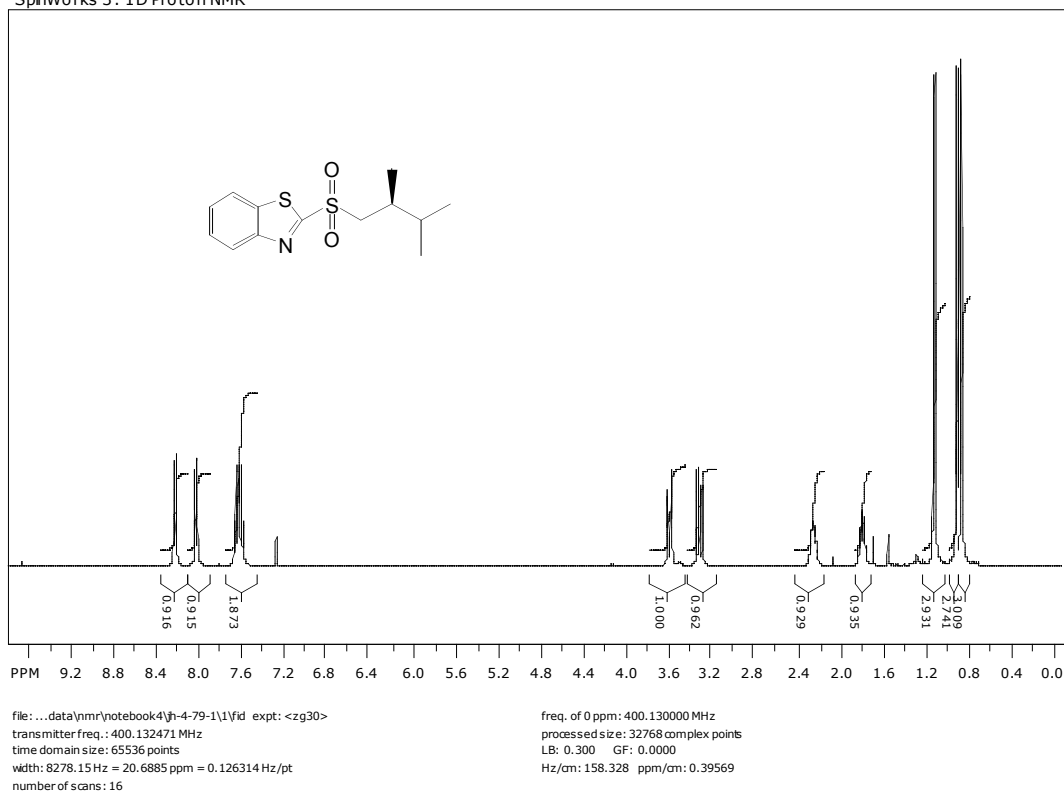

SphWorks 3: 13C

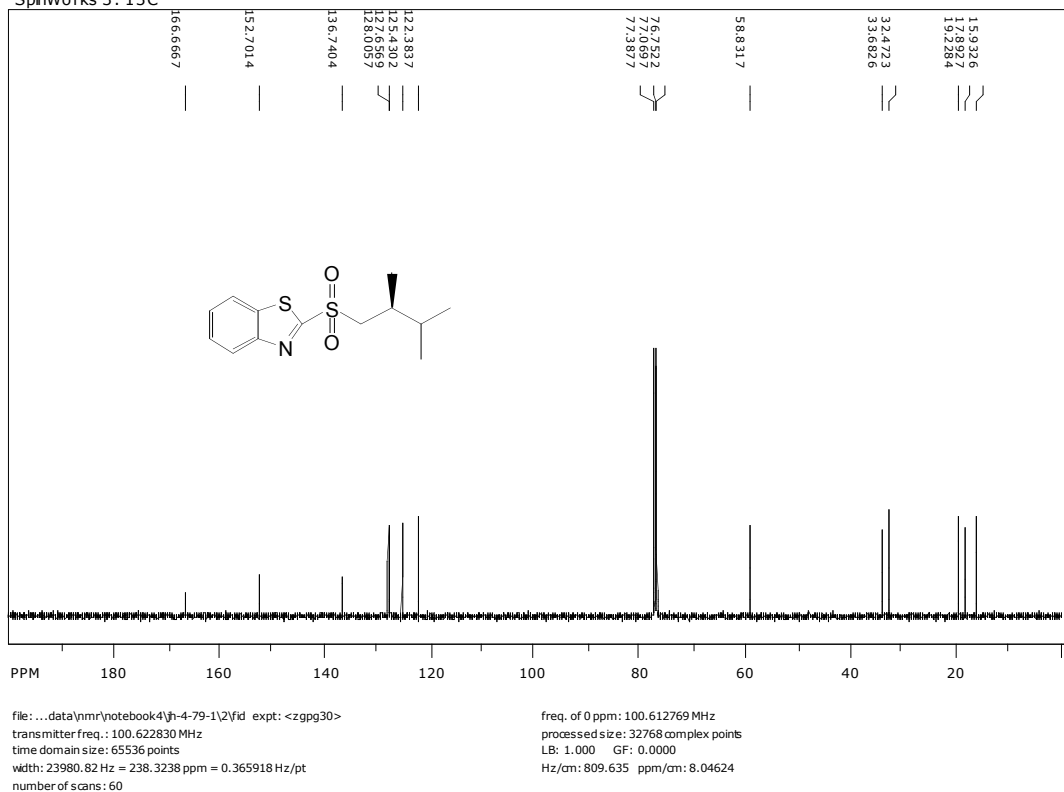

<sup>1</sup>H and <sup>13</sup>C of 10





SphWorks 3: 1D Proton NMR

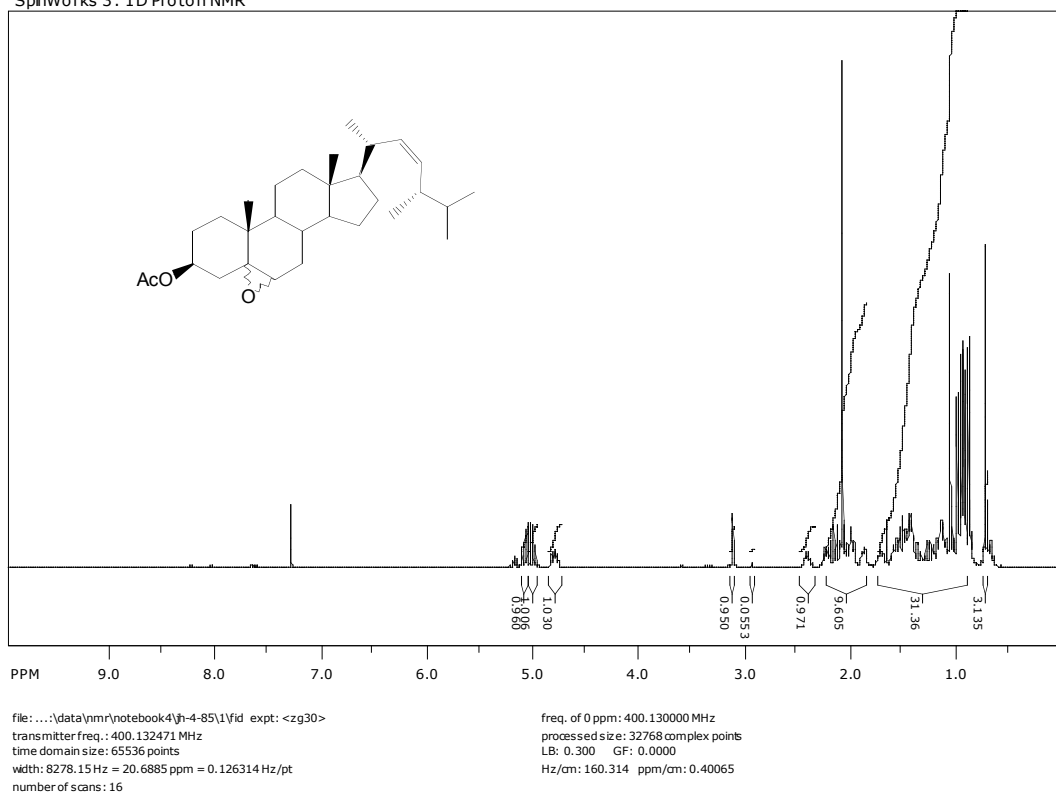

SphWorks 3: 13C

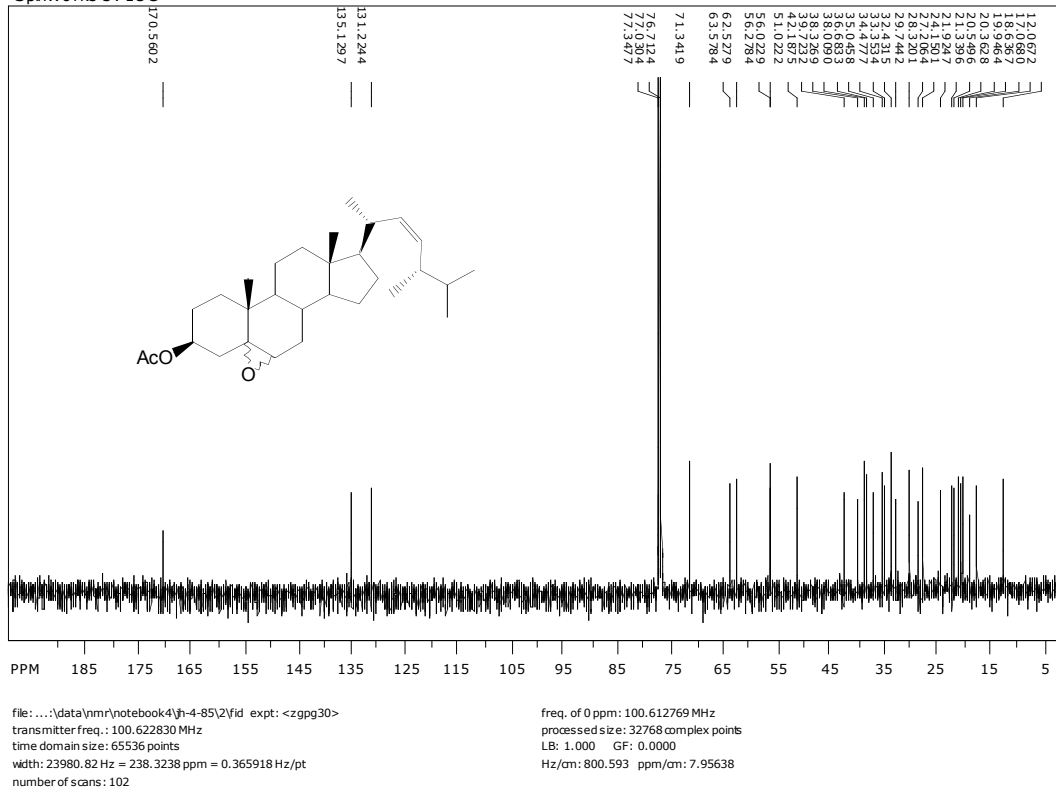

<sup>1</sup>H and <sup>13</sup>C of 12ab

SphWorks 3: 1D Proton

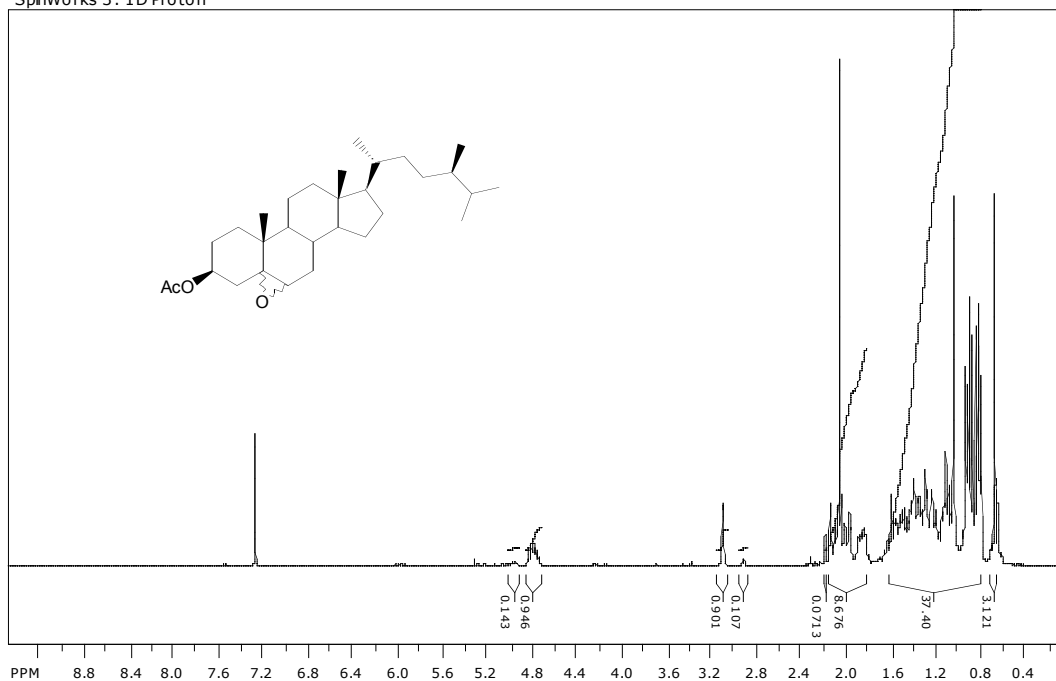

file: ...:\data\nmr\notebook4\h-4-87\1\fid expt: <zg30>  
 transmitter freq.: 300.131853 MHz  
 time domain size: 65536 points  
 width: 6172.84 Hz = 20.5671 ppm = 0.094190 Hz/pt  
 number of scans: 16

freq. of 0 ppm: 300.130000 MHz  
 processed size: 32768 complex points  
 LB: 0.300 GF: 0.0000  
 Hz/cm: 113.407 ppm/cm: 0.37786

SphWorks 3: 13C

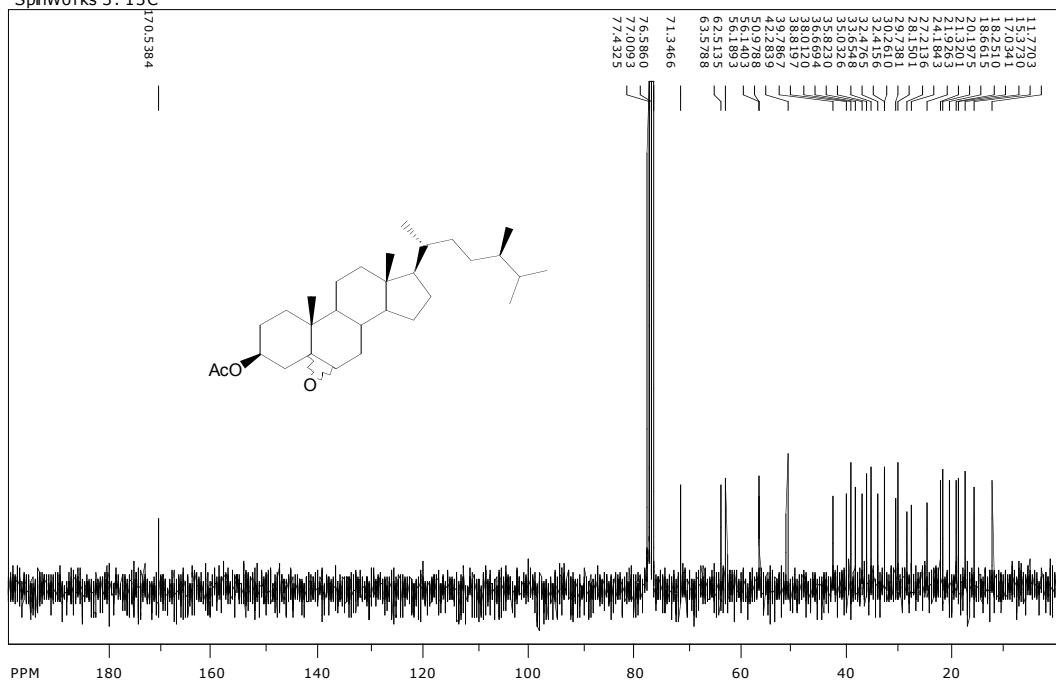

file: ...:\data\nmr\notebook4\h-4-87\2\fid expt: <zpgg30>  
 transmitter freq.: 75.475295 MHz  
 time domain size: 32768 points  
 width: 17985.61 Hz = 238.2980 ppm = 0.548877 Hz/pt  
 number of scans: 251

freq. of 0 ppm: 75.467749 MHz  
 processed size: 32768 complex points  
 LB: 1.000 GF: 0.0000  
 Hz/cm: 605.993 ppm/cm: 8.02903

<sup>1</sup>H and <sup>13</sup>C of 13ab

SphWorks 3: 1D Proton NMR

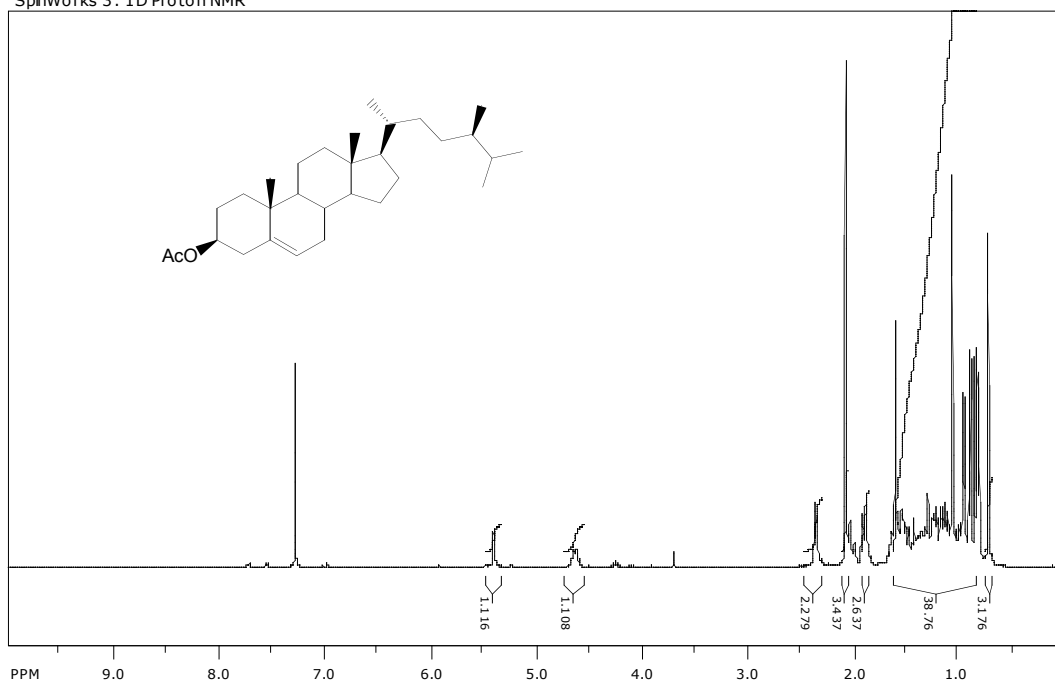

file: ...data\nmr\notebook4\jh-4-88\1\fid expt: <zg30>  
 transmitter freq.: 400.132471 MHz  
 time domain size: 65536 points  
 width: 8278.15 Hz = 20.6885 ppm = 0.126314 Hz/pt  
 number of scans: 16

freq. of 0 ppm: 400.130000 MHz  
 processed size: 32768 complex points  
 LB: 0.300 GF: 0.0000  
 Hz/cm: 160.314 ppm/cm: 0.40065

SphWorks 3: 13C

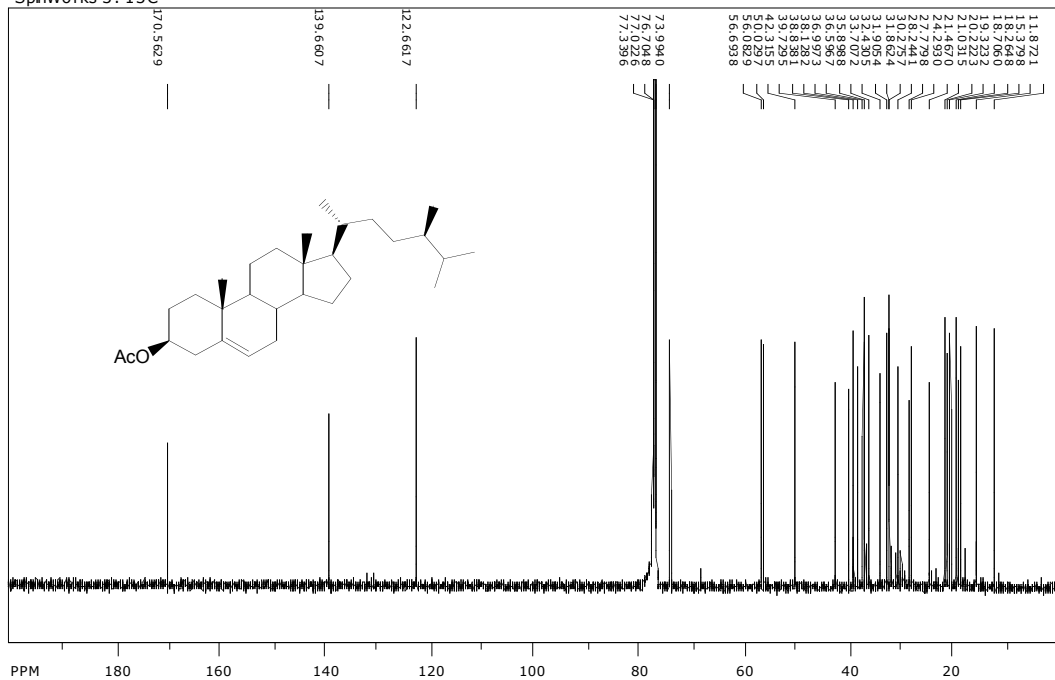

file: ...ta\nmr\notebook4\jh-4-88-III\2\fid expt: <zpgg30>  
 transmitter freq.: 100.622830 MHz  
 time domain size: 65536 points  
 width: 23980.82 Hz = 238.3238 ppm = 0.365918 Hz/pt  
 number of scans: 10240

freq. of 0 ppm: 100.612769 MHz  
 processed size: 32768 complex points  
 LB: 1.000 GF: 0.0000  
 Hz/cm: 814.567 ppm/cm: 8.09525

<sup>1</sup>H and <sup>13</sup>C of campesterol acetate (14)
